# Supplementary material for: A solid substrate based on clay minerals for sampling organic liquids in molecular LIBS analysis
Source: Royal Society of Chemistry journal article supplement (doi:10.1039/d3ja00442b), 2024-01-01
Supplement: d3ja00442b1.pdf [file d3ja00442b1.pdf]

**Solid substrate based on clay minerals for sampling organic liquids  
in molecular LIBS analysis**

Layla P. Santos, José F. Q. Pereira e Ivo M. Raimundo Jr.\*

Universidade Estadual de Campinas, UNICAMP, PO Box 6154, 13083-970, Campinas,  
Brazil

E-mail address: [ivo@unicamp.br](mailto:ivo@unicamp.br)

**Table 1.** Results of elemental analysis by CHNS technique.

| <b>Samples</b>            | <b>Weight (mg)</b> | <b>Carbon (mg)</b> | <b>Hydrogen (mg)</b> | <b>Nitrogen (mg)</b> |
|---------------------------|--------------------|--------------------|----------------------|----------------------|
| <b>Natural bentonite</b>  | 2,10               | 0,17               | 1,58                 | -0,04                |
| <b>Calcined bentonite</b> | 1,74               | 0,10               | 1,35                 | -0,05                |
| <b>Natural sepiolite</b>  | 2,04               | 0,1                | 0,06                 | -0,09                |
| <b>Calcined sepiolite</b> | 1,36               | 0,05               | -0,01                | -0,07                |

\*Null values of mass for sulfur in different conditions.
